# Supplementary material
Source: MDPI journal article supplement (https://www.mdpi.com/2313-433X/6/5/34)
Supplement: s1 [file s1]

**Table S1.** First 10 eigenvalues for conventional PCA and mPCA (four levels). Estimates of the (standard) errors (SEs) associated with the eigenvalues can be found using Monte Carlo simulation (number of MC replicates = 1000), assuming a multivariate normal distribution for the landmark point data.

| Eigenvalue Number | SL PCA | SD    | mPCA Level 1 (Smoking) | SD    | mPCA Level 2 (Alcohol) | SD    | mPCA Level 3 (Sex) | SD    | mPCA Level 4 (Subject) | SD    |
|-------------------|--------|-------|------------------------|-------|------------------------|-------|--------------------|-------|------------------------|-------|
| 1                 | 28.777 | 0.665 | 0.567                  | 0.199 | 0.453                  | 0.161 | 13.166             | 0.105 | 24.851                 | 0.871 |
| 2                 | 14.983 | 0.326 | 0.415                  | 0.085 | 0.249                  | 0.067 | 0.349              | 0.041 | 14.823                 | 0.410 |
| 3                 | 12.829 | 0.288 | 0.374                  | 0.054 | 0.235                  | 0.043 | 0.335              | 0.026 | 11.862                 | 0.387 |
| 4                 | 9.564  | 0.185 | 0.243                  | 0.036 | 0.184                  | 0.028 | 0.293              | 0.019 | 9.482                  | 0.249 |
| 5                 | 9.386  | 0.185 | 0.209                  | 0.025 | 0.135                  | 0.021 | 0.248              | 0.014 | 8.581                  | 0.240 |
| 6                 | 8.048  | 0.186 | 0.169                  | 0.019 | 0.103                  | 0.016 | 0.210              | 0.011 | 6.915                  | 0.254 |
| 7                 | 4.781  | 0.096 | 0.123                  | 0.014 | 0.090                  | 0.013 | 0.184              | 0.009 | 4.785                  | 0.131 |
| 8                 | 4.627  | 0.095 | 0.099                  | 0.012 | 0.072                  | 0.010 | 0.160              | 0.007 | 4.342                  | 0.123 |
| 9                 | 3.902  | 0.089 | 0.094                  | 0.009 | 0.057                  | 0.008 | 0.146              | 0.006 | 4.004                  | 0.131 |
| 10                | 3.387  | 0.074 | 0.078                  | 0.008 | 0.053                  | 0.007 | 0.121              | 0.005 | 3.343                  | 0.095 |

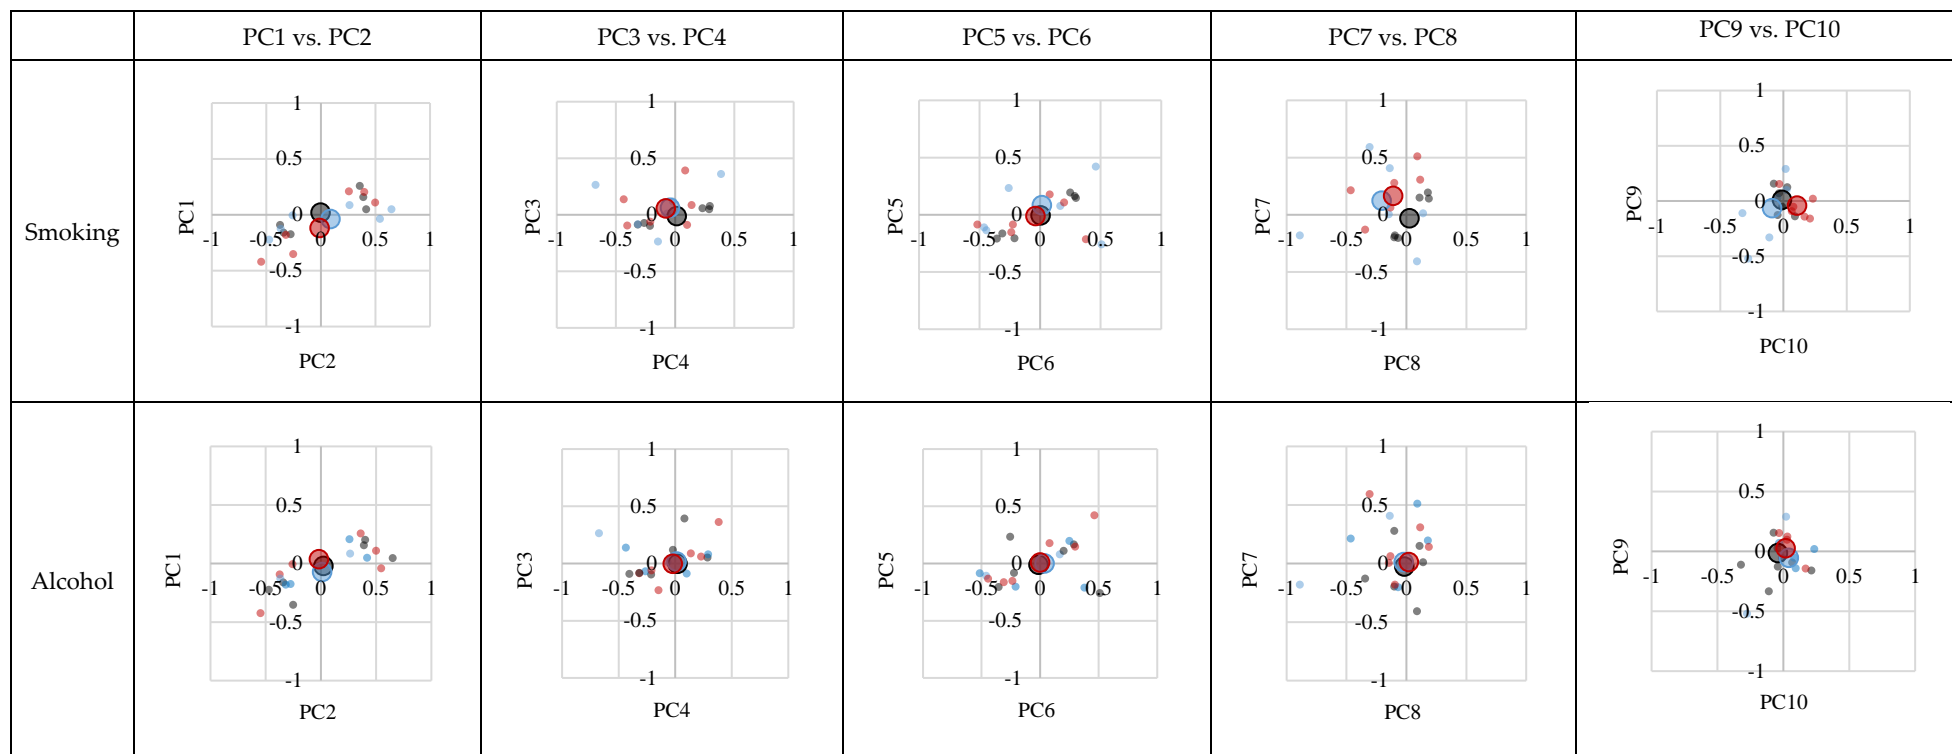

Figure S1: Scatter plots of the standardized component scores for conventional PCA up to PC10.

Group centroids (18 groups) are represented as smaller landmarks, and global centroids are represented as larger landmarks. A subtle pattern in the separation of the group means is visible at PC7/8, with the global centroid of individuals whose mothers did not smoke during pregnancy distant to the global centroid of those whose mothers smoked during pregnancy. No other obvious patterns in the separation of the group means is visualised.

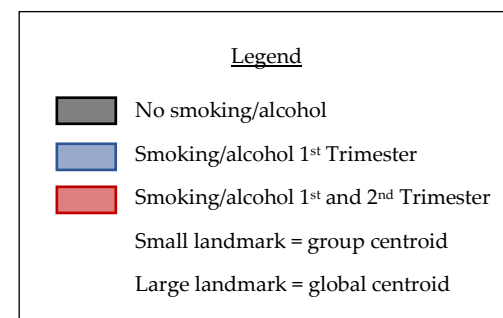

**Table S2.** Frequencies and mean smoking levels (smoking, 1<sup>st</sup> trimester)

| Grouping                                                                                         | Sex    | Smoking Levels | Mid Interval Value (m) | Frequency (f) | Mean (cigarettes/day) | Standard Deviation (cigarettes/day) |
|--------------------------------------------------------------------------------------------------|--------|----------------|------------------------|---------------|-----------------------|-------------------------------------|
| Smoking 1 <sup>st</sup> trimester only<br>No alcohol                                             | Male   | 1–4 cigs/day   | 2.5                    | 14            | 7.10                  | 7.16                                |
|                                                                                                  |        | 5–9 cigs/day   | 7                      | <5            |                       |                                     |
|                                                                                                  |        | 10–14 cigs/day | 12                     | <5            |                       |                                     |
|                                                                                                  |        | 15–19 cigs/day | 17                     | <5            |                       |                                     |
|                                                                                                  |        | 20–24 cigs/day | 22                     | <5            |                       |                                     |
|                                                                                                  |        | 25–29 cigs/day | 27.5                   | <5            |                       |                                     |
|                                                                                                  |        | 30+ cigs/day   | 30                     | <5*           |                       |                                     |
|                                                                                                  | Female | 1–4 cigs/day   | <5                     | 7             | 7.19                  | 5.35                                |
|                                                                                                  |        | 5–9 cigs/day   | 7                      | 7             |                       |                                     |
|                                                                                                  |        | 10–14 cigs/day | 12                     | <5            |                       |                                     |
|                                                                                                  |        | 15–19 cigs/day | 17                     | <5            |                       |                                     |
|                                                                                                  |        | 20–24 cigs/day | 22                     | <5            |                       |                                     |
|                                                                                                  |        | 25–29 cigs/day | 27.5                   | <5*           |                       |                                     |
|                                                                                                  |        | 30+ cigs/day   | 30                     | <5*           |                       |                                     |
| Smoking 1 <sup>st</sup> trimester only<br>Alcohol 1 <sup>st</sup> trimester only                 | Male   | 1–4 cigs/day   | 2.5                    | 8             | 5.5                   | 4.27                                |
|                                                                                                  |        | 5–9 cigs/day   | 7                      | <5            |                       |                                     |
|                                                                                                  |        | 10–14 cigs/day | 12                     | <5            |                       |                                     |
|                                                                                                  |        | 15–19 cigs/day | 17                     | <5            |                       |                                     |
|                                                                                                  |        | 20–24 cigs/day | 22                     | <5*           |                       |                                     |
|                                                                                                  |        | 25–29 cigs/day | 27.5                   | <5*           |                       |                                     |
|                                                                                                  |        | 30+ cigs/day   | 30                     | <5*           |                       |                                     |
|                                                                                                  | Female | 1–4 cigs/day   | 2.5                    | 5             | 9.26                  | 6.28                                |
|                                                                                                  |        | 5–9 cigs/day   | 7                      | 6             |                       |                                     |
|                                                                                                  |        | 10–14 cigs/day | 12                     | 5             |                       |                                     |
|                                                                                                  |        | 15–19 cigs/day | 17                     | <5            |                       |                                     |
|                                                                                                  |        | 20–24 cigs/day | 22                     | <5*           |                       |                                     |
|                                                                                                  |        | 25–29 cigs/day | 27.5                   | <5            |                       |                                     |
|                                                                                                  |        | 30+ cigs/day   | 30                     | <5*           |                       |                                     |
| Smoking 1 <sup>st</sup> trimester only<br>Alcohol 1 <sup>st</sup> and 2 <sup>nd</sup> trimester  | Male   | 1–4 cigs/day   | 2.5                    | 19            | 7.24                  | 6.30                                |
|                                                                                                  |        | 5–9 cigs/day   | 7                      | 12            |                       |                                     |
|                                                                                                  |        | 10–14 cigs/day | 12                     | 6             |                       |                                     |
|                                                                                                  |        | 15–19 cigs/day | 17                     | <5*           |                       |                                     |
|                                                                                                  |        | 20–24 cigs/day | 22                     | <5            |                       |                                     |
|                                                                                                  |        | 25–29 cigs/day | 27.5                   | <5            |                       |                                     |
|                                                                                                  |        | 30+ cigs/day   | 30                     | <5*           |                       |                                     |
|                                                                                                  | Female | 1–4 cigs/day   | 2.5                    | 22            | 7.77                  | 6.74                                |
|                                                                                                  |        | 5–9 cigs/day   | 7                      | 7             |                       |                                     |
|                                                                                                  |        | 10–14 cigs/day | 12                     | 8             |                       |                                     |
|                                                                                                  |        | 15–19 cigs/day | 17                     | <5            |                       |                                     |
|                                                                                                  |        | 20–24 cigs/day | 22                     | <5            |                       |                                     |
|                                                                                                  |        | 25–29 cigs/day | 27.5                   | <5*           |                       |                                     |
|                                                                                                  |        | 30+ cigs/day   | 30                     | <5            |                       |                                     |
| Smoking 1 <sup>st</sup> and 2 <sup>nd</sup> trimesters<br>No alcohol                             | Male   | 1–4 cigs/day   | 2.5                    | 16            | 10.48                 | 6.27                                |
|                                                                                                  |        | 5–9 cigs/day   | 7                      | 13            |                       |                                     |
|                                                                                                  |        | 10–14 cigs/day | 12                     | 23            |                       |                                     |
|                                                                                                  |        | 15–19 cigs/day | 17                     | 12            |                       |                                     |
|                                                                                                  |        | 20–24 cigs/day | 22                     | <5            |                       |                                     |
|                                                                                                  |        | 25–29 cigs/day | 27.5                   | <5            |                       |                                     |
|                                                                                                  |        | 30+ cigs/day   | 30                     | <5            |                       |                                     |
|                                                                                                  | Female | 1–4 cigs/day   | 2.5                    | 17            | 10.88                 | 6.90                                |
|                                                                                                  |        | 5–9 cigs/day   | 7                      | 18            |                       |                                     |
|                                                                                                  |        | 10–14 cigs/day | 12                     | 14            |                       |                                     |
|                                                                                                  |        | 15–19 cigs/day | 17                     | 14            |                       |                                     |
|                                                                                                  |        | 20–24 cigs/day | 22                     | 7             |                       |                                     |
|                                                                                                  |        | 25–29 cigs/day | 27.5                   | <5            |                       |                                     |
|                                                                                                  |        | 30+ cigs/day   | 30                     | <5*           |                       |                                     |
| Smoking 1 <sup>st</sup> and 2 <sup>nd</sup> trimesters<br>Alcohol 1 <sup>st</sup> trimester only | Male   | 1–4 cigs/day   | 2.5                    | <5            | 10.70                 | 7.06                                |
|                                                                                                  |        | 5–9 cigs/day   | 7                      | 9             |                       |                                     |
|                                                                                                  |        | 10–14 cigs/day | 12                     | <5            |                       |                                     |
|                                                                                                  |        | 15–19 cigs/day | 17                     | <5            |                       |                                     |
|                                                                                                  |        | 20–24 cigs/day | 22                     | <5            |                       |                                     |

|                                                                                                                           |        |                |      |     |       |      |
|---------------------------------------------------------------------------------------------------------------------------|--------|----------------|------|-----|-------|------|
|                                                                                                                           |        | 25–29 cigs/day | 27.5 | <5* |       |      |
|                                                                                                                           |        | 30+ cigs/day   | 30   | <5  |       |      |
|                                                                                                                           | Female | 1–4 cigs/day   | 2.5  | <5  | 11.19 | 5.73 |
|                                                                                                                           |        | 5–9 cigs/day   | 7    | 14  |       |      |
|                                                                                                                           |        | 10–14 cigs/day | 12   | 8   |       |      |
|                                                                                                                           |        | 15–19 cigs/day | 17   | 6   |       |      |
|                                                                                                                           |        | 20–24 cigs/day | 22   | <5  |       |      |
|                                                                                                                           |        | 25–29 cigs/day | 27.5 | <5* |       |      |
|                                                                                                                           |        | 30+ cigs/day   | 30   | <5* |       |      |
| Smoking 1 <sup>st</sup><br>and 2 <sup>nd</sup><br>trimesters<br>Alcohol 1 <sup>st</sup> and<br>2 <sup>nd</sup> trimesters | Male   | 1–4 cigs/day   | 2.5  | 31  | 10.54 | 6.81 |
|                                                                                                                           |        | 5–9 cigs/day   | 7    | 20  |       |      |
|                                                                                                                           |        | 10–14 cigs/day | 12   | 37  |       |      |
|                                                                                                                           |        | 15–19 cigs/day | 17   | 13  |       |      |
|                                                                                                                           |        | 20–24 cigs/day | 22   | 10  |       |      |
|                                                                                                                           |        | 25–29 cigs/day | 27.5 | <5  |       |      |
|                                                                                                                           |        | 30+ cigs/day   | 30   | <5* |       |      |
|                                                                                                                           | Female | 1–4 cigs/day   | 2.5  | 28  | 11.26 | 7.64 |
|                                                                                                                           |        | 5–9 cigs/day   | 7    | 34  |       |      |
|                                                                                                                           |        | 10–14 cigs/day | 12   | 20  |       |      |
|                                                                                                                           |        | 15–19 cigs/day | 17   | 18  |       |      |
|                                                                                                                           |        | 20–24 cigs/day | 22   | 13  |       |      |
|                                                                                                                           |        | 25–29 cigs/day | 27.5 | 7   |       |      |
|                                                                                                                           |        | 30+ cigs/day   | 30   | <5  |       |      |

\*This many contain zero.

**Table S3.** Frequencies and mean smoking levels (smoking, 2<sup>nd</sup> trimester).

| Grouping                                                                                                         | Sex    | Smoking Levels | Mid Interval Value (m) | Frequency (f) | Mean (cigarettes/day) | Standard Deviation (cigarettes/day) |
|------------------------------------------------------------------------------------------------------------------|--------|----------------|------------------------|---------------|-----------------------|-------------------------------------|
| Smoking 1 <sup>st</sup> and 2 <sup>nd</sup> trimesters<br>No alcohol                                             | Male   | 1-4 cigs/day   | 2.5                    | 19            | 10.47                 | 7.40                                |
|                                                                                                                  |        | 5-9 cigs/day   | 7                      | 17            |                       |                                     |
|                                                                                                                  |        | 10-14 cigs/day | 12                     | 13            |                       |                                     |
|                                                                                                                  |        | 15-19 cigs/day | 17                     | 10            |                       |                                     |
|                                                                                                                  |        | 20-24 cigs/day | 22                     | 6             |                       |                                     |
|                                                                                                                  |        | 25-29 cigs/day | 27.5                   | <5            |                       |                                     |
|                                                                                                                  |        | 30+ cigs/day   | 30                     | <5            |                       |                                     |
|                                                                                                                  | Female | 1-4 cigs/day   | 2.5                    | 13            | 11.47                 | 6.34                                |
|                                                                                                                  |        | 5-9 cigs/day   | 7                      | 16            |                       |                                     |
|                                                                                                                  |        | 10-14 cigs/day | 12                     | 19            |                       |                                     |
|                                                                                                                  |        | 15-19 cigs/day | 17                     | 16            |                       |                                     |
|                                                                                                                  |        | 20-24 cigs/day | 22                     | 7             |                       |                                     |
|                                                                                                                  |        | 25-29 cigs/day | 27.5                   | <5            |                       |                                     |
|                                                                                                                  |        | 30+ cigs/day   | 30                     | <5*           |                       |                                     |
| Smoking 1 <sup>st</sup> and 2 <sup>nd</sup> trimesters<br>Alcohol 1 <sup>st</sup> trimester only                 | Male   | 1-4 cigs/day   | 2.5                    | 8             | 8.48                  | 5.94                                |
|                                                                                                                  |        | 5-9 cigs/day   | 7                      | 6             |                       |                                     |
|                                                                                                                  |        | 10-14 cigs/day | 12                     | 6             |                       |                                     |
|                                                                                                                  |        | 15-19 cigs/day | 17                     | <5            |                       |                                     |
|                                                                                                                  |        | 20-24 cigs/day | 22                     | <5            |                       |                                     |
|                                                                                                                  |        | 25-29 cigs/day | 27.5                   | <5*           |                       |                                     |
|                                                                                                                  |        | 30+ cigs/day   | 30                     | <5*           |                       |                                     |
|                                                                                                                  | Female | 1-4 cigs/day   | 2.5                    | 9             | 9.56                  | 6.33                                |
|                                                                                                                  |        | 5-9 cigs/day   | 7                      | 12            |                       |                                     |
|                                                                                                                  |        | 10-14 cigs/day | 12                     | 6             |                       |                                     |
|                                                                                                                  |        | 15-19 cigs/day | 17                     | <5            |                       |                                     |
|                                                                                                                  |        | 20-24 cigs/day | 22                     | <5            |                       |                                     |
|                                                                                                                  |        | 25-29 cigs/day | 27.5                   | <5*           |                       |                                     |
|                                                                                                                  |        | 30+ cigs/day   | 30                     | <5*           |                       |                                     |
| Smoking 1 <sup>st</sup> and 2 <sup>nd</sup> trimesters<br>Alcohol 1 <sup>st</sup> and 2 <sup>nd</sup> trimesters | Male   | 1-4 cigs/day   | 2.5                    | 34            | 9.66                  | 6.56                                |
|                                                                                                                  |        | 5-9 cigs/day   | 7                      | 28            |                       |                                     |
|                                                                                                                  |        | 10-14 cigs/day | 12                     | 28            |                       |                                     |
|                                                                                                                  |        | 15-19 cigs/day | 17                     | 14            |                       |                                     |
|                                                                                                                  |        | 20-24 cigs/day | 22                     | 9             |                       |                                     |
|                                                                                                                  |        | 25-29 cigs/day | 27.5                   | <5            |                       |                                     |
|                                                                                                                  |        | 30+ cigs/day   | 30                     | <5            |                       |                                     |
|                                                                                                                  | Female | 1-4 cigs/day   | 2.5                    | 31            | 10.81                 | 7.46                                |
|                                                                                                                  |        | 5-9 cigs/day   | 7                      | 32            |                       |                                     |
|                                                                                                                  |        | 10-14 cigs/day | 12                     | 23            |                       |                                     |
|                                                                                                                  |        | 15-19 cigs/day | 17                     | 15            |                       |                                     |
|                                                                                                                  |        | 20-24 cigs/day | 22                     | 14            |                       |                                     |
|                                                                                                                  |        | 25-29 cigs/day | 27.5                   | 5             |                       |                                     |
|                                                                                                                  |        | 30+ cigs/day   | 30                     | <5            |                       |                                     |

\*This many contain zero.

**Table S4.** Frequencies and mean alcohol levels (alcohol, 1<sup>st</sup> trimester)<sup>1</sup>.

| Grouping                                                                                                      | Sex    | Alcohol Levels <sup>2</sup> | Mid Interval Value [per week] (m) | Frequency (f) | Mean (glasses/week) | Standard Deviation (glasses/week) |
|---------------------------------------------------------------------------------------------------------------|--------|-----------------------------|-----------------------------------|---------------|---------------------|-----------------------------------|
| No smoking Alcohol 1 <sup>st</sup> trimester only                                                             | Male   | <1 glass/week               | 0.5                               | 195           | 0.82                | 2.91                              |
|                                                                                                               |        | 1–2 glasses/week            | 1.5                               | 17            |                     |                                   |
|                                                                                                               |        | 1–2 glasses/day             | 10.5                              | <5            |                     |                                   |
|                                                                                                               |        | 3–9 glasses/day             | 42                                | <5            |                     |                                   |
|                                                                                                               |        | 10+ glasses/day             | 70                                | <5*           |                     |                                   |
|                                                                                                               | Female | <1 glass/week               | <5                                | 243           | 0.68                | 0.90                              |
|                                                                                                               |        | 1–2 glasses/week            | <5                                | 30            |                     |                                   |
|                                                                                                               |        | 1–2 glasses/day             | 10.5                              | <5            |                     |                                   |
|                                                                                                               |        | 3–9 glasses/day             | 42                                | <5*           |                     |                                   |
| No smoking Alcohol 1 <sup>st</sup> and 2 <sup>nd</sup> trimesters                                             | Male   | <1 glass/week               | 0.5                               | 491           | 1.17                | 3.40                              |
|                                                                                                               |        | 1–2 glasses/week            | 1.5                               | 192           |                     |                                   |
|                                                                                                               |        | 1–2 glasses/day             | 10.5                              | 17            |                     |                                   |
|                                                                                                               |        | 3–9 glasses/day             | 42                                | <5            |                     |                                   |
|                                                                                                               |        | 10+ glasses/day             | 70                                | <5            |                     |                                   |
|                                                                                                               | Female | <1 glass/week               | <5                                | 550           | 1.02                | 2.04                              |
|                                                                                                               |        | 1–2 glasses/week            | <5                                | 209           |                     |                                   |
|                                                                                                               |        | 1–2 glasses/day             | 10.5                              | 15            |                     |                                   |
|                                                                                                               |        | 3–9 glasses/day             | 42                                | <5            |                     |                                   |
| Smoking 1 <sup>st</sup> trimester only Alcohol 1 <sup>st</sup> trimester only                                 | Male   | <1 glass/week               | 0.5                               | 10            | 2.07                | 3.46                              |
|                                                                                                               |        | 1–2 glasses/week            | 1.5                               | <5            |                     |                                   |
|                                                                                                               |        | 1–2 glasses/day             | 10.5                              | <5            |                     |                                   |
|                                                                                                               |        | 3–9 glasses/day             | 42                                | <5*           |                     |                                   |
|                                                                                                               |        | 10+ glasses/day             | 70                                | <5*           |                     |                                   |
|                                                                                                               | Female | <1 glass/week               | 0.5                               | 14            | 1.24                | 2.22                              |
|                                                                                                               |        | 1–2 glasses/week            | 1.5                               | <5            |                     |                                   |
|                                                                                                               |        | 1–2 glasses/day             | 10.5                              | <5            |                     |                                   |
|                                                                                                               |        | 3–9 glasses/day             | 42                                | <5*           |                     |                                   |
| Smoking 1 <sup>st</sup> trimester only Alcohol 1 <sup>st</sup> and 2 <sup>nd</sup> trimester                  | Male   | <1 glass/week               | 0.5                               | 23            | 1.16                | 1.56                              |
|                                                                                                               |        | 1–2 glasses/week            | 1.5                               | 17            |                     |                                   |
|                                                                                                               |        | 1–2 glasses/day             | 10.5                              | <5            |                     |                                   |
|                                                                                                               |        | 3–9 glasses/day             | 42                                | <5*           |                     |                                   |
|                                                                                                               |        | 10+ glasses/day             | 70                                | <5*           |                     |                                   |
|                                                                                                               | Female | <1 glass/week               | 0.5                               | 25            | 2.26                | 6.40                              |
|                                                                                                               |        | 1–2 glasses/week            | 1.5                               | 16            |                     |                                   |
|                                                                                                               |        | 1–2 glasses/day             | 10.5                              | <5            |                     |                                   |
|                                                                                                               |        | 3–9 glasses/day             | 42                                | <5            |                     |                                   |
| Smoking 1 <sup>st</sup> and 2 <sup>nd</sup> trimesters Alcohol 1 <sup>st</sup> trimester only                 | Male   | <1 glass/week               | 0.5                               | 19            | 0.67                | 0.38                              |
|                                                                                                               |        | 1–2 glasses/week            | 1.5                               | <5            |                     |                                   |
|                                                                                                               |        | 1–2 glasses/day             | 10.5                              | <5*           |                     |                                   |
|                                                                                                               |        | 3–9 glasses/day             | 42                                | <5*           |                     |                                   |
|                                                                                                               |        | 10+ glasses/day             | 70                                | <5*           |                     |                                   |
|                                                                                                               | Female | <1 glass/week               | 0.5                               | 28            | 0.70                | 0.40                              |
|                                                                                                               |        | 1–2 glasses/week            | 1.5                               | 7             |                     |                                   |
|                                                                                                               |        | 1–2 glasses/day             | 10.5                              | <5*           |                     |                                   |
|                                                                                                               |        | 3–9 glasses/day             | 42                                | <5*           |                     |                                   |
| Smoking 1 <sup>st</sup> and 2 <sup>nd</sup> trimesters Alcohol 1 <sup>st</sup> and 2 <sup>nd</sup> trimesters | Male   | <1 glass/week               | 0.5                               | 63            | 1.97                | 5.63                              |
|                                                                                                               |        | 1–2 glasses/week            | 1.5                               | 46            |                     |                                   |
|                                                                                                               |        | 1–2 glasses/day             | 10.5                              | <5            |                     |                                   |
|                                                                                                               |        | 3–9 glasses/day             | 42                                | <5            |                     |                                   |
|                                                                                                               |        | 10+ glasses/day             | 70                                | <5*           |                     |                                   |
|                                                                                                               | Female | <1 glass/week               | 0.5                               | 75            | 2.29                | 5.81                              |
|                                                                                                               |        | 1–2 glasses/week            | 1.5                               | 34            |                     |                                   |
|                                                                                                               |        | 1–2 glasses/day             | 10.5                              | 10            |                     |                                   |
|                                                                                                               |        | 3–9 glasses/day             | 42                                | <5            |                     |                                   |
|                                                                                                               |        | 10+ glasses/day             | 70                                | <5*           |                     |                                   |
|                                                                                                               |        |                             |                                   |               |                     |                                   |
|                                                                                                               |        |                             |                                   |               |                     |                                   |
|                                                                                                               |        |                             |                                   |               |                     |                                   |
|                                                                                                               |        |                             |                                   |               |                     |                                   |
|                                                                                                               |        |                             |                                   |               |                     |                                   |
|                                                                                                               |        |                             |                                   |               |                     |                                   |
|                                                                                                               |        |                             |                                   |               |                     |                                   |
|                                                                                                               |        |                             |                                   |               |                     |                                   |

<sup>1</sup>Where alcohol had been categorised per day, the midpoint of the grouping was multiplied by 7 to estimate alcohol intake per week. Where alcohol intake was recorded as <1 glass/week, this was taken as 0.5 glasses/week.

<sup>2</sup> The mothers were asked to take “glass” to mean “a pub measure of spirits, half a pint of lager or cider, a glass of wine etc”

\*This may include zero.

**Table S5.** Frequencies and mean alcohol levels (alcohol, 2<sup>nd</sup> trimester)<sup>1</sup>.

| Grouping                                                                                                      | Sex    | Alcohol Levels <sup>2</sup> | Mid Interval Value (m) | Frequency (f) | Mean (glasses/week) | Standard Deviation (glasses/week) |
|---------------------------------------------------------------------------------------------------------------|--------|-----------------------------|------------------------|---------------|---------------------|-----------------------------------|
| No smoking Alcohol 1 <sup>st</sup> and 2 <sup>nd</sup> trimesters                                             | Male   | <1 glass/week               | 0.5                    | 466           | 1.22                | 3.42                              |
|                                                                                                               |        | 1–2 glasses/week            | 1.5                    | 216           |                     |                                   |
|                                                                                                               |        | 1–2 glasses/day             | 10.5                   | 18            |                     |                                   |
|                                                                                                               |        | 3–9 glasses/day             | 42                     | <5            |                     |                                   |
|                                                                                                               |        | 10+ glasses/day             | 70                     | <5            |                     |                                   |
|                                                                                                               | Female | <1 glass/week               | 0.5                    | 524           | 1.10                | 2.87                              |
|                                                                                                               |        | 1–2 glasses/week            | 1.5                    | 234           |                     |                                   |
|                                                                                                               |        | 1–2 glasses/day             | 10.5                   | 16            |                     |                                   |
|                                                                                                               |        | 3–9 glasses/day             | 42                     | <5*           |                     |                                   |
|                                                                                                               |        | 10+ glasses/day             | 70                     | <5            |                     |                                   |
| Smoking 1 <sup>st</sup> trimester only Alcohol 1 <sup>st</sup> and 2 <sup>nd</sup> trimester                  | Male   | <1 glass/week               | 0.5                    | 27            | 0.84                | 0.47                              |
|                                                                                                               |        | 1–2 glasses/week            | 1.5                    | 14            |                     |                                   |
|                                                                                                               |        | 1–2 glasses/day             | 10.5                   | <5*           |                     |                                   |
|                                                                                                               |        | 3–9 glasses/day             | 42                     | <5*           |                     |                                   |
|                                                                                                               |        | 10+ glasses/day             | 70                     | <5*           |                     |                                   |
|                                                                                                               | Female | <1 glass/week               | 0.5                    | 29            | 1.25                | 2.07                              |
|                                                                                                               |        | 1–2 glasses/week            | 1.5                    | 13            |                     |                                   |
|                                                                                                               |        | 1–2 glasses/day             | 10.5                   | <5            |                     |                                   |
|                                                                                                               |        | 3–9 glasses/day             | 42                     | <5*           |                     |                                   |
|                                                                                                               |        | 10+ glasses/day             | 70                     | <5*           |                     |                                   |
| Smoking 1 <sup>st</sup> and 2 <sup>nd</sup> trimesters Alcohol 1 <sup>st</sup> and 2 <sup>nd</sup> trimesters | Male   | <1 glass/week               | 0.5                    | 70            | 1.20                | 1.83                              |
|                                                                                                               |        | 1–2 glasses/week            | 1.5                    | 41            |                     |                                   |
|                                                                                                               |        | 1–2 glasses/day             | 10.5                   | <5            |                     |                                   |
|                                                                                                               |        | 3–9 glasses/day             | 42                     | <5*           |                     |                                   |
|                                                                                                               |        | 10+ glasses/day             | 70                     | <5*           |                     |                                   |
|                                                                                                               | Female | <1 glass/week               | 0.5                    | 81            | 1.28                | 2.15                              |
|                                                                                                               |        | 1–2 glasses/week            | 1.5                    | 34            |                     |                                   |
|                                                                                                               |        | 1–2 glasses/day             | 10.5                   | 6             |                     |                                   |
|                                                                                                               |        | 3–9 glasses/day             | 42                     | <5*           |                     |                                   |
|                                                                                                               |        | 10+ glasses/day             | 70                     | <5*           |                     |                                   |

<sup>1</sup>Where alcohol had been categorised per day, the midpoint of the grouping was multiplied by 7 to estimate alcohol intake per week. Where alcohol intake was recorded as <1 glass/week, this was taken as 0.5 glasses/week.

<sup>2</sup> The mothers were asked to take “glass” to mean “a pub measure of spirits, half a pint of lager or cider, a glass of wine etc”.

\*This may contain zero.
